# Supplementary material for: Compact CPL emitters based on a [2.2]paracyclophane scaffold: recent developments and future perspectives
Source: Royal Society of Chemistry journal article supplement (doi:10.1039/d2tc04885j), 2023-01-01

## **Compact CPL emitters based on a [2.2]paracyclophane scaffold: Recent developments and future perspectives**

Simon Felder,<sup>a</sup> Marie-Leonie Delcourt,<sup>a</sup> Damian Contant,<sup>a</sup> Rafael Rodríguez,<sup>b</sup> Ludovic Favereau,<sup>b</sup> Jeanne Crassous,<sup>\*b</sup> Laurent Micouin,<sup>\*a</sup> and Erica Benedetti<sup>\*a</sup>

<sup>a</sup> Université Paris Cité, CNRS, Laboratoire de Chimie et de Biochimie Pharmacologiques et Toxicologiques, F-75006 Paris, France

<sup>b</sup> Univ Rennes, CNRS, ISCR (Institut des Sciences Chimiques de Rennes) – UMR 6226, F-35000 Rennes, France

### **Supporting information**

#### **Table of Contents**

|                                                                                   |     |
|-----------------------------------------------------------------------------------|-----|
| General remarks                                                                   | S2  |
| List of abbreviations                                                             | S3  |
| Experimental and characterization data                                            | S4  |
| Copies of <sup>1</sup> H NMR, <sup>13</sup> C NMR and <sup>19</sup> F NMR spectra | S17 |
| Circular dichroism and circularly polarized luminescence – Dissymmetry factors    | S20 |

## General remarks

All reactions were carried out under inert atmosphere, (in oven-dried glassware, using dry solvents unless otherwise specified. All commercially available compounds were purchased from Aldrich Chemical Co., Acros Organics or Alfa Aesar and used as received. Analytical thin layer chromatography (TLC) was performed on silica gel plates (Merck 60F254) visualized with a UV lamp (254 nm). Flash chromatography was performed on silica gel (60-230 mesh) unless otherwise specified. Organic extracts were dried over anhydrous  $\text{MgSO}_4$ . NMR spectra ( $^1\text{H}$  and  $^{13}\text{C}\{^1\text{H}\}$ ) were recorded on Bruker Avancell 500 spectrometer, at 500 MHz ( $^1\text{H}$  value) in  $\text{CDCl}_3$ . Spectra were referenced to residual chloroform (7.26 ppm,  $^1\text{H}$ ; 77.0 ppm,  $^{13}\text{C}\{^1\text{H}\}$ ). Chemical shifts are reported in ppm, multiplicities are indicated by s (singlet), d (doublet), t (triplet), q (quartet), p (pentet), and m (multiplet or overlap of nonequivalent resonances), dd (doublet of doublet), td (triplet of doublet), and br (broad signal). Coupling constants,  $J$ , are reported in hertz (Hz). DEPT-135 experiments were used to assign  $^{13}\text{C}$  NMR spectra. All NMR spectra were obtained at 300K unless otherwise specified. All microwave-mediated reactions were carried out using a Biotage Initiator™ Exp or an Anton Paar Monowave microwave synthesizer. The microwave reactions were carried out in 2 - 5 mL vials. Optical rotations ( $\alpha_D$ ) were measured on a Perkin Elmer polarimeter (model 341) at 20 °C. IR spectra were obtained using a spectrum one FT-IR spectrometer (Perkin Elmer). High Resolution mass spectra were recorded on a ThermoFischer Exactive Orbitrap spectrometer. HPLC analyses were performed on a Shimadzu chromatograph equipped with a diode array UV/VIS detector. Absorption and fluorescence spectra were recorded on UV-2700 spectrophotometer (Shimadzu) and F-7000 fluorescence spectrometer (Hitachi), respectively. The photophysical measurements were performed on air-equilibrated solutions, using quartz cuvettes with 1 cm optical path length. Electronic circular dichroism (ECD, in  $\text{M}^{-1}\text{cm}^{-1}$ ) was measured on a Jasco J-815 Circular Dichroism Spectrometer (IFR140 facility - Biosit - Université de Rennes 1). The circularly polarized luminescence (CPL) measurements were performed using a home-built CPL spectrofluoropolarimeter (set-up by JASCO company). The samples were excited using a 90° geometry with a Xenon ozone-free lamp 150 W LS. The following parameters were used: emission slit width  $\approx$  2 mm, integration time = 4 sec, scan speed = 50 nm/min, accumulations = 5. The concentration of all the samples was  $\sim 10^{-4}$  M in  $\text{CH}_2\text{Cl}_2$ . Excitation of the samples were performed at 360 nm.

Enantiopure aldehydes ( $R_p$ )-**1a** and ( $S_p$ )-**1a** were prepared according to a method developed in our laboratory and described previously.<sup>1</sup> Optically active naphthalene derivatives ( $R_p$ )-**5a** and ( $S_p$ )-**5a** were prepared according to a previously reported procedure.<sup>2</sup>

---

<sup>1</sup> M.-L. Delcourt, S. Turcaud, E. Benedetti, L. Micouin, *Adv. Synth. Catal.* 2016, **358**, 1213.

<sup>2</sup> E. Benedetti, M.-L. Delcourt, B. Gatin-Fraudet, S. Turcaud, L. Micouin, *RSC Adv.* 2017, **7**, 5047.

## List of abbreviations

|                   |                                     |
|-------------------|-------------------------------------|
| ATH               | Asymmetric transfer hydrogenation   |
| CPL               | Circularly polarized luminescence   |
| CVD               | Chemical vapour deposition          |
| DBU               | 1,8-Diazabicyclo(5.4.0)undec-7-ene  |
| DCC               | Dicyclohexylcarbodiimide            |
| DCE               | 1,2-Dichloroethane                  |
| DCM               | Dichloromethane                     |
| DIBAL-H           | Diisobutylaluminium hydride         |
| DMAP              | 4-(Dimethylamino)pyridine           |
| DMP               | Dess-Martin periodinane             |
| DMSO              | Dimethyl sulfoxide                  |
| DNA               | Deoxyribonucleic acid               |
| ECD               | Electronic circular dichroism       |
| equiv.            | equivalents                         |
| ESI               | Electrospray ionization             |
| Et <sub>2</sub> O | Diethyl ether                       |
| EtOH              | Ethanol                             |
| $g_{\text{asb}}$  | Absorption dissymmetry factor       |
| $g_{\text{lum}}$  | Luminescence dissymmetry factor     |
| HPLC              | High pressure liquid chromatography |
| IR                | Infrared                            |
| MeOH              | Methanol                            |
| min               | minutes                             |
| $\mu\text{w}$     | Microwave irradiation               |
| NMR               | Nuclear magnetic resonance          |
| OFET              | Organic field-effect transistors    |
| OLED              | Organic light-emitting diodes       |
| pCp               | [2.2]paracyclophane                 |
| PhNO <sub>2</sub> | Nitrobenzene                        |
| $\theta$          | Quantum yield                       |
| quant.            | quantitative                        |
| rt                | Room temperature                    |
| THF               | tetrahydrofuran                     |
| TLC               | Thin layer chromatography           |
| UV-Vis            | Ultra-violet and visible            |
| VCD               | Vibrational circular dichroism      |

## Experimental procedures and characterization data

### (*R<sub>p</sub>*)-4-acetyl [2.2]paracyclophane **19**

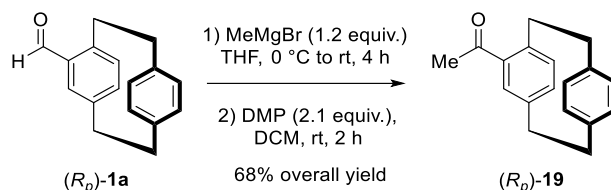

In a flame and vacuum-dried 100 mL round bottom flask, under argon, (*R<sub>p</sub>*)-**1a** (500 mg, 2.12 mmol, 1.0 equiv.) was dissolved in dry THF (30 mL) and cooled to 0 °C using an ice bath, MeMgBr (3 M in Et<sub>2</sub>O, 0.85 mL, 2.54 mmol, 1.2 equiv.) was subsequently added dropwise using a syringe. The brown mixture was allowed to warm back to rt and was stirred for 4 h. After cooling back to 0 °C, the reaction was quenched by addition of NH<sub>4</sub>Cl (15 mL), then diluted with water (30 mL) and EtOAc (30 mL). The resulting immiscible phases were separated, and the aqueous layer was extracted with EtOAc (2 x 15 mL). The combined organic layers were washed with water (20 mL) and brine (20 mL), dried over MgSO<sub>4</sub>, gravity filtered and evaporated under reduced pressure. The crude oily residue was dissolved in dry DCM (40 mL) and Dess-Martin periodinane (DMP, 1.75 g, 4.12 mmol, 2.1 equiv.) was added. The cloudy reaction mixture was stirred for 2 h at rt before addition of sat'd aq. NaHCO<sub>3</sub> (20 mL) and water (20 mL). The resulting immiscible phases were separated, and the aqueous layer was extracted with DCM (2 x 15 mL). The combined organic layers were washed with brine (20 mL), dried over MgSO<sub>4</sub>, gravity filtered and concentrated under reduced pressure. The obtained solid residue was purified by column chromatography (SiO<sub>2</sub>) using pentane:EtOAc (10:1) as the eluent to yield (*R<sub>p</sub>*)-**19** (365 mg, 1.46 mmol, 68%) as an amorphous white solid.

**<sup>1</sup>H NMR** (500 MHz, CDCl<sub>3</sub>) δ 6.93 (d, *J* = 1.8 Hz, 1H), 6.66 (dd, *J* = 7.7, 1.6 Hz, 1H), 6.59 – 6.48 (m, 3H), 6.46 (dd, *J* = 7.8, 1.8 Hz, 1H), 6.38 (dd, *J* = 7.8, 1.8 Hz, 1H), 4.00–3.92 (m, 1H), 3.23 – 3.12 (m, 4H), 3.07 – 2.98 (m, 2H), 2.87 – 2.79 (m, 1H), 2.47 (s, 3H) ppm.

**<sup>13</sup>C NMR** (125 MHz, CDCl<sub>3</sub>) δ 200.3 (C), 141.6 (C), 140.3 (C), 139.7 (C), 139.1 (C), 137.8 (C), 136.4 (CH), 136.3 (CH), 134.2 (CH), 133.0 (CH), 132.8 (CH), 132.0 (CH), 131.1 (CH), 36.0 (CH<sub>2</sub>), 35.1 (CH<sub>2</sub>), 35.1 (CH<sub>2</sub>), 34.8 (CH<sub>2</sub>), 28.7 (CH<sub>3</sub>) ppm.

**IR** ν 2930, 1737, 1672, 1552, 1434, 1353, 1265, 1237, 950, 899, 855, 794, 732 cm<sup>-1</sup>.

**[α]<sub>D</sub><sup>20</sup>** –17 (c 1.15, CHCl<sub>3</sub>).

Known compound. Spectroscopic data are in agreement with the literature.<sup>3</sup>

### (*S<sub>p</sub>*)-4-acetyl [2.2]paracyclophane **19**

Compound (*S<sub>p</sub>*)-**19** was prepared following the procedure employed to synthesize product (*R<sub>p</sub>*)-**19**: (*S<sub>p</sub>*)-**1a** (700 mg, 2.96 mmol, 1.0 equiv.) and MeMgBr (3 M in Et<sub>2</sub>O, 3.55 mmol, 1.2 equiv.) in dry THF (45 mL) for 4 h; this residue and DMP (1.75 g, 4.12 mmol, 1.5 equiv.) in dry DCM (45 mL). (*S<sub>p</sub>*)-**19** (279 mg, 1.11 mmol, 38% over the two steps) was obtained as an amorphous white solid. **[α]<sub>D</sub><sup>20</sup>** = + 32 (c 2, CHCl<sub>3</sub>).

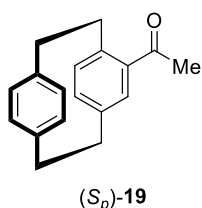

<sup>3</sup> S. Irii, T. Ogaki, H. Miyashita, K. Nobori, Y. Ozawa, M. Abe, H. Sato, E. Ohta, Y. Matsui, H. Ikeda, *Tetrahedron Lett.* 2022, **101**, 153913.

*(R<sub>p</sub>)-(Z)-1-(1,4(1,4)-dibenzenacyclohexaphane-12-yl)-3-hydroxy-3-phenylprop-2-en-1-one 20a*

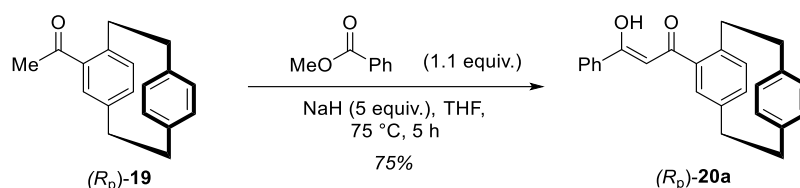

In a flame and vacuum-dried vial, under an argon atmosphere, NaH (60% in mineral oil, 80 mg, 2.0 mmol, 5 equiv) was suspended in dry THF (1 mL). *(R<sub>p</sub>)-19* (100 mg, 0.4 mmol, 1.0 equiv.) was dissolved in dry THF (1.5 mL) and slowly added dropwise at rt. The suspension was stirred for 1 h before addition of methyl benzoate (55  $\mu$ L, 0.44 mmol, 1 mL). The vial was then sealed and heated to 75 °C in an oil bath. After 5 h, the orange solution was cooled to 0 °C, and a diluted HCl aq. solution (2 N, 5 mL) was slowly added. Water (5 mL) and EtOAc (10 mL) were then added, and the resulting immiscible phases were separated. The aqueous layer was extracted with EtOAc (2 x 5 mL). The combined organic layers were washed with water (10 mL) and brine (10 mL), dried over MgSO<sub>4</sub>, gravity filtered and evaporated under reduced pressure. The crude residue was purified by column chromatography (SiO<sub>2</sub>) using Cy:EtOAc (20:1) as the eluent to yield *(R<sub>p</sub>)-20a* (107 mg, 0.3 mmol, 75 %) as an orange sticky solid.

<sup>1</sup>H NMR (500 MHz, CDCl<sub>3</sub>)  $\delta$  8.03 – 7.91 (m, 2H), 7.54 (dd, *J* = 5.0, 3.7 Hz, 1H), 7.53 – 7.42 (m, 2H), 6.92 (d, *J* = 1.8 Hz, 1H), 6.72 – 6.62 (m, 2H), 6.63 – 6.51 (m, 3H), 6.49 (s, 1H), 6.46 (dd, *J* = 7.8, 1.6 Hz, 1H), 3.94 – 3.86 (m, 1H), 3.24 – 3.11 (m, 3H), 3.05 (ddd, *J* = 15.1, 6.9, 3.4 Hz, 2H), 2.96 (ddd, *J* = 13.1, 9.4, 6.9 Hz, 2H) ppm.

<sup>13</sup>C NMR (125 MHz, CDCl<sub>3</sub>)  $\delta$  189.7 (C), 183.9 (C), 140.4 (C), 140.1 (C), 139.9 (C), 139.3 (C), 136.7 (C), 136.4 (CH), 136.0 (CH), 135.5 (C), 132.8 (CH), 132.7 (CH), 132.6 (CH), 132.4 (CH), 132.3 (CH), 131.7 (CH), 128.7 (2CH), 127.0 (2CH), 96.8 (CH), 35.7 (CH<sub>2</sub>), 35.5 (CH<sub>2</sub>), 35.3 (CH<sub>2</sub>), 35.2 (CH<sub>2</sub>) ppm. IR  $\nu$  2927, 1738, 1599, 1566, 1456, 1365, 1228, 1217, 913, 775, 744 cm<sup>-1</sup>.

[ $\alpha$ ]<sub>589</sub> = –124 (c 0.4, CHCl<sub>3</sub>).

Known compound. Spectroscopic data are in agreement with the literature.<sup>4</sup>

*(S<sub>p</sub>)-(Z)-1-(1,4(1,4)-dibenzenacyclohexaphane-12-yl)-3-hydroxy-3-phenylprop-2-en-1-one 20a*

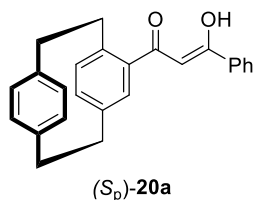

Compound *(S<sub>p</sub>)-20a* was prepared following the procedure employed to synthesize product *(R<sub>p</sub>)-20a*: NaH (60% in mineral oil, 144 mg, 3.6 mmol, 5 equiv.), *(S<sub>p</sub>)-19* (180 mg, 0.72 mmol, 1.0 equiv.), methyl benzoate (100  $\mu$ L, 0.79 mmol, 1.1 equiv.) in dry THF (4.5 mL). *(S<sub>p</sub>)-20a* (189 mg, 0.53 mmol, 74 % yield) was isolated as an orange sticky solid. Spectroscopic data correspond to that of previously described for compound *(R<sub>p</sub>)-20a*.

[ $\alpha$ ]<sub>589</sub> = +119 (c 0.36, CHCl<sub>3</sub>).

<sup>4</sup> M. Tanaka, S. Muraoka, Y. Matsui, E. Ohta, A. Sakai, T. Ogaki, Y. Yoshimoto, K. Mizuno, H. Ikeda, *ChemPhotoChem* 2017, **1**, 188.

**HPLC analysis** :  $t_{R1}$  = 10.3 min;  $t_{R2}$  = 12.1 min. [Column = Chiralcel OD (250 x 4.6 mm); eluent = *n*-heptane/*i*-PrOH (9:1); T = 20 °C; flow = 1 mL/min;  $\lambda$  = 350 nm).]

Co-injection of (*R<sub>p</sub>*)-**20a** and (*S<sub>p</sub>*)-**20a**.

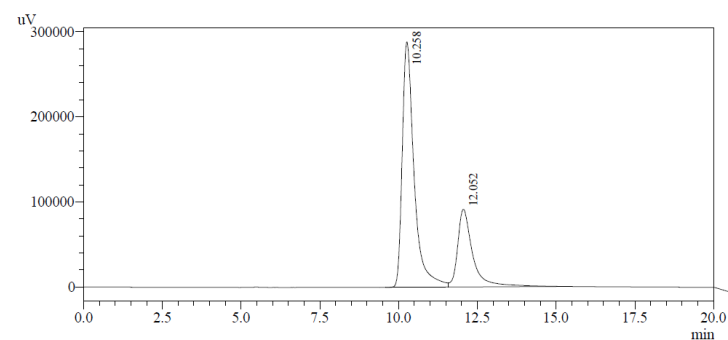

1 PDA Multi 1 / 350nm 4nm

PeakTable

PDA Ch1 350nm 4nm

| Peak# | Ret. Time | Area     | Height | Area %  | Height % |
|-------|-----------|----------|--------|---------|----------|
| 1     | 10.258    | 7569580  | 288502 | 71.160  | 75.948   |
| 2     | 12.052    | 3067774  | 91368  | 28.840  | 24.052   |
| Total |           | 10637354 | 379870 | 100.000 | 100.000  |

Injection of pure (*R<sub>p</sub>*)-**20a**:  $t_R$  = 10.2 min.

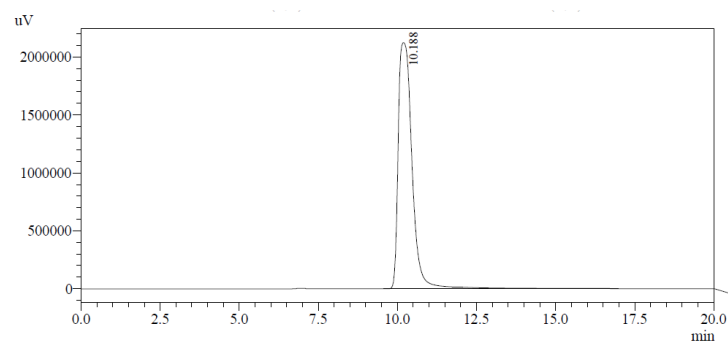

1 PDA Multi 1 / 350nm 4nm

PeakTable

PDA Ch1 350nm 4nm

| Peak# | Ret. Time | Area     | Height  | Area %  | Height % |
|-------|-----------|----------|---------|---------|----------|
| 1     | 10.188    | 64878899 | 2122890 | 100.000 | 100.000  |
| Total |           | 64878899 | 2122890 | 100.000 | 100.000  |

Injection of pure (*S<sub>p</sub>*)-**20a**:  $t_R$  = 11.9 min.

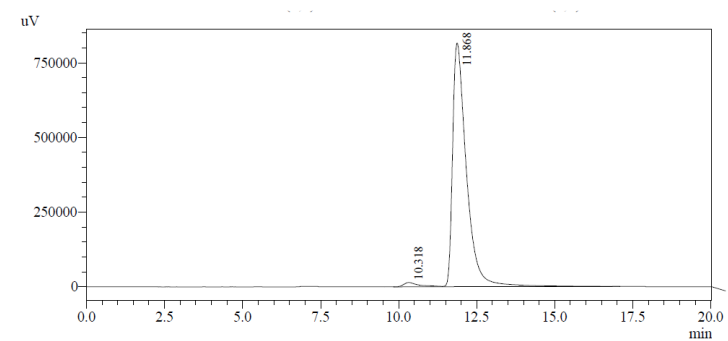

1 PDA Multi 1 / 350nm 4nm

PeakTable

PDA Ch1 350nm 4nm

| Peak# | Ret. Time | Area     | Height | Area %  | Height % |
|-------|-----------|----------|--------|---------|----------|
| 1     | 10.318    | 495498   | 14408  | 1.927   | 1.735    |
| 2     | 11.868    | 25214739 | 816198 | 98.073  | 98.265   |
| Total |           | 25710237 | 830606 | 100.000 | 100.000  |

**UV-Vis absorption and fluorescence emission :**

Absorbance max: 354 nm ( $10^{-5}$  M solution in DCM); Emission max: 435 nm ( $10^{-5}$  M solution in  $\text{CHCl}_3$ ,  $\lambda_{\text{ex}} = 350$  nm).

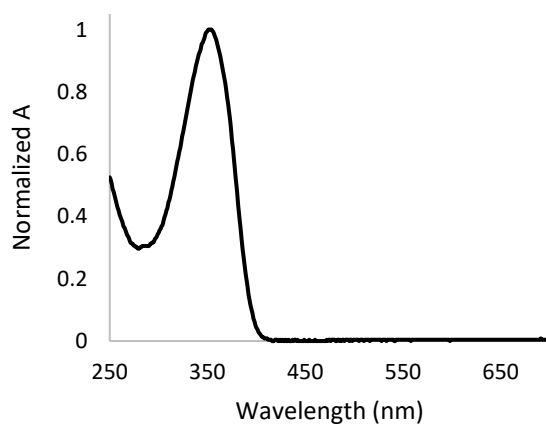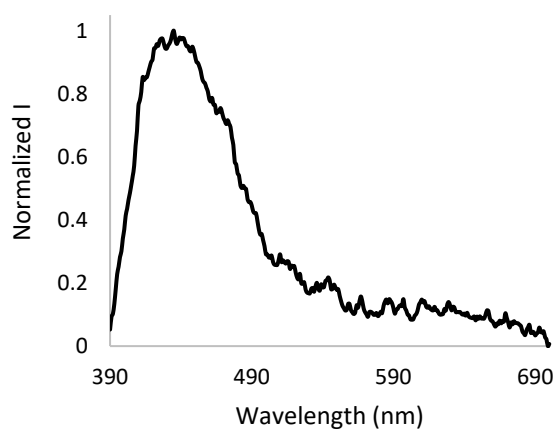

*(R<sub>p</sub>)-(Z)-1-(1,4(1,4)-dibenzenacyclohexaphane-12-yl)-3-hydroxy-3-(4-methoxyphenyl)prop-2-en-1-one*  
**20b**

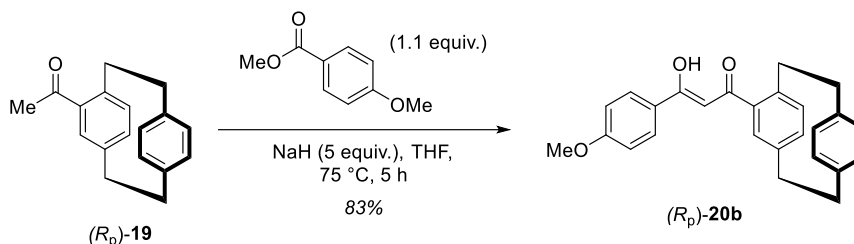

Compound (*R<sub>p</sub>*)-**20b** was prepared following the procedure employed to synthesize product (*R<sub>p</sub>*)-**20a**: NaH (60% in mineral oil, 32 mg, 0.8 mmol, 5 equiv.), (*R<sub>p</sub>*)-**19** (40 mg, 0.16 mmol, 1.0 equiv.), methyl *p*-anisate (29 mg, 0.18 mmol, 1.1 equiv.) in dry THF (1 mL). Column eluent = Cy:EtOAc 10:1. (*R<sub>p</sub>*)-**3.46** (51 mg, 0.13 mmol, 83 %) was obtained as a yellow amorphous solid.

**<sup>1</sup>H NMR** (500 MHz, CDCl<sub>3</sub>) δ 7.96-7.91 (m, 2H), 7.00-6.96 (m, 2H), 6.91-6.88 (m, 1H), 6.67 (dd, *J* = 1.4, 9 Hz, 1H), 6.62 (dd, *J* = 1.7, 8.5 Hz, 1H), 6.59-6.52 (m, 3H), 6.46 (dd, *J* = 1.3, 8 Hz, 1H), 6.4 (s, 1H), 3.95-3.82 (m, 5H), 3.22-3.09 (m, 4H), 3.09-3.00 (m, 2H), 3.00-2.88 (m, 1H) ppm.

**<sup>13</sup>C NMR** (125 MHz, CDCl<sub>3</sub>) δ 187.8 (C), 184.7 (C), 163.1 (C), 140.1 (C), 139.9 (C), 139.9 (C), 139.3 (C), 136.8 (C), 136.3 (CH), 135.7 (CH), 132.8 (CH), 132.6 (CH), 132.4 (CH), 131.8 (CH), 129.2 (CH), 128.2 (CH), 114.0 (CH), 113.9 (CH), 113.6 (CH), 96.0 (CH), 55.5 (CH<sub>3</sub>), 35.6 (CH<sub>2</sub>), 35.5 (CH<sub>2</sub>), 35.3 (CH<sub>2</sub>), 35.2 (CH<sub>2</sub>) ppm.

**IR** ν 2929, 1715, 1603, 1508, 1456, 1438, 1306 1259, 1231, 1173, 1029, 844, 803 cm<sup>-1</sup>.

**HRMS** (ESI-Orbitrap) *m/z*: [M+H]<sup>+</sup> Calcd for C<sub>26</sub>H<sub>25</sub>O<sub>3</sub> 385.1798; Found 385.1787

[α]<sub>589</sub> = − 166 (c 0.6, CHCl<sub>3</sub>).

Novel compound. Copies of the NMR spectra are provided at the end of the document.

*(S<sub>p</sub>)-(Z)-1-(1,4(1,4)-dibenzenacyclohexaphane-12-yl)-3-hydroxy-3-(4-methoxyphenyl)prop-2-en-1-one*  
**20b**

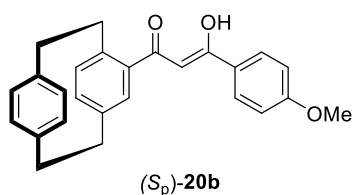

Compound (*S<sub>p</sub>*)-**20b** was prepared following the procedure employed to synthesize product (*R<sub>p</sub>*)-**20a**: NaH (60% in mineral oil, 40 mg, 1 mmol, 5 equiv.), (*S<sub>p</sub>*)-**19** (50 mg, 0.2 mmol, 1.0 equiv.), methyl *p*-anisate (36.5 mg, 0.22 mmol, 1.1 equiv.) in dry THF (1.25 mL). Column eluent = Cy:EtOAc 10:1. (*R<sub>p</sub>*)-**3.46** (51 mg, 0.13 mmol, 76 %) was obtained as a yellow amorphous solid. Spectroscopic data correspond to that previously described for compound (*R<sub>p</sub>*)-**20b**

[α]<sub>589</sub> = +159 (c 0.8, CHCl<sub>3</sub>).



**HPLC analysis** :  $t_{R1}$  = 18.3 min;  $t_{R2}$  = 20.9 min. [Column = Chiralcel OD (250 x 4.6 mm); eluent = *n*-heptane/*i*-PrOH (9:1); T = 20 °C; flow = 1 mL/min;  $\lambda$  = 350 nm).]

Co-injection of (*R<sub>p</sub>*)-**20b** and (*S<sub>p</sub>*)-**20b**.

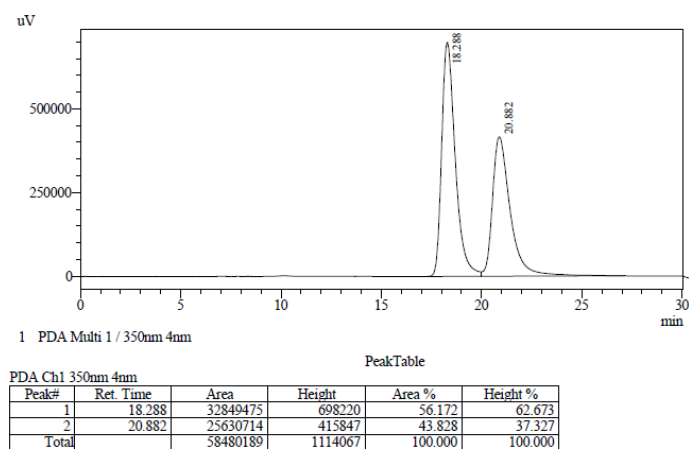

Injection of pure (*R<sub>p</sub>*)-**3.46**:  $t_{R1}$  = 18.4 min;  $t_{R2}$  = 20.8 min

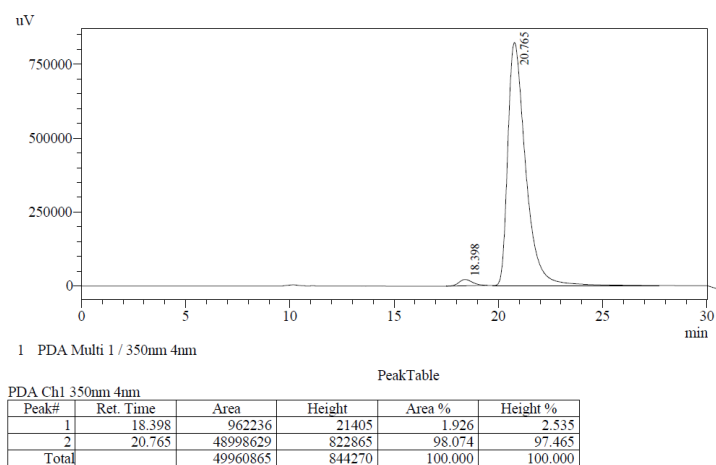

Injection of pure (*S<sub>p</sub>*)-**3.46**:  $t_{R1}$  = 18.2 min

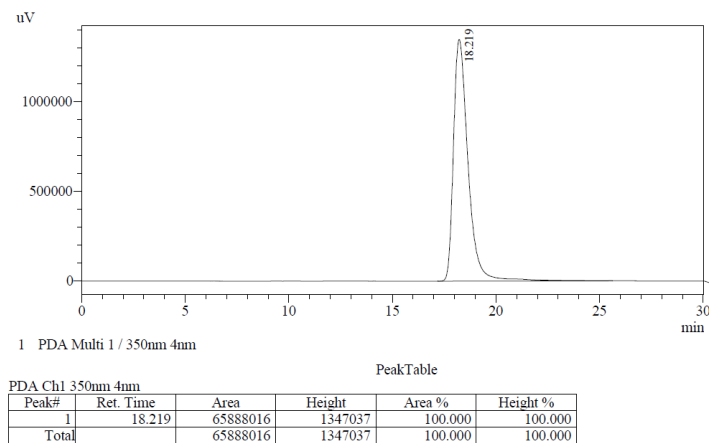

### UV-vis absorption and fluorescence emission spectroscopy:

Absorbance max: 360 nm ( $10^{-5}$  M solution in  $\text{CHCl}_3$ ); Emission max: 435 nm ( $10^{-6}$  M solution in  $\text{CHCl}_3$ ,  $\lambda_{\text{ex}} = 360$  nm).

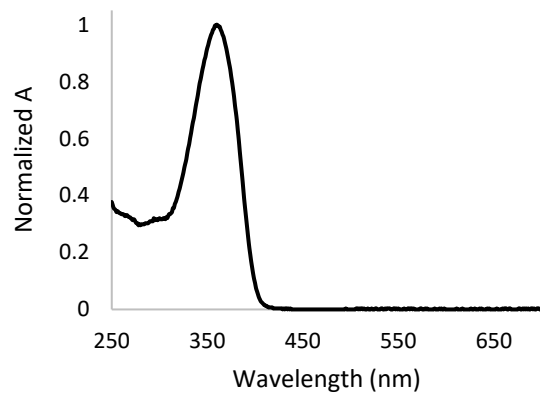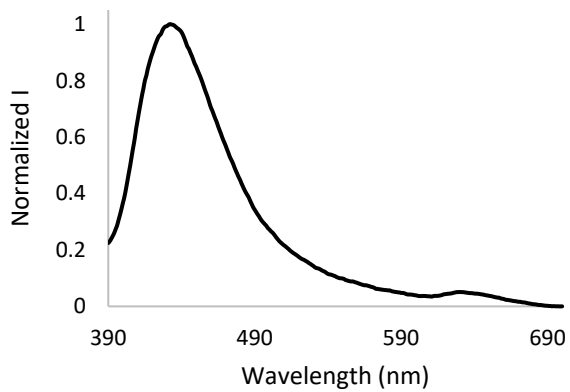

*(R<sub>p</sub>)-4-(1,4(1,4)-dibenzenacyclohexaphane-12-yl)-2,2-difluoro-6-phenyl-2H-1,3/3,2/4-dioxaborinine*  
**21a**

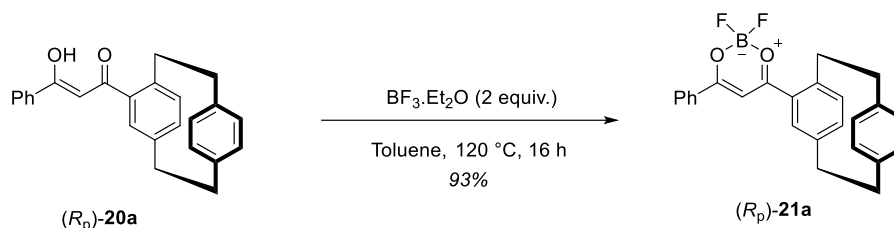

In a flame and vacuum-dried vial, under argon atmosphere, (*R<sub>p</sub>*)-**20a** (44 mg, 0.12 mmol, 1.0 equiv.) was dissolved in dry toluene (1 mL).  $\text{BF}_3 \cdot \text{Et}_2\text{O}$  (30  $\mu\text{L}$ , 0.24 mmol, 2.0 equiv.) was slowly added dropwise at rt, turning the orange solution brown. The vial was sealed and the reaction mixture was heated at 120 °C for 16 h. The solution was then cooled back to rt and evaporated under reduced pressure. The resulting crude residue was purified by column chromatography ( $\text{SiO}_2$ ) using pentane:EtOAc (8:2) as the eluent to yield (*R<sub>p</sub>*)-**21a** (45 mg, 0.11 mmol, 93 %) as a bright yellow solid.

**<sup>1</sup>H NMR** (500 MHz,  $\text{CDCl}_3$ )  $\delta$  8.19 – 8.06 (m, 2H), 7.73 – 7.62 (m, 1H), 7.56 (dd,  $J$  = 10.7, 5.0 Hz, 2H), 7.10 (d,  $J$  = 1.8 Hz, 1H), 6.84 (s, 1H), 6.78 (dd,  $J$  = 7.8, 1.8 Hz, 1H), 6.66 (d,  $J$  = 7.8 Hz, 1H), 6.64 – 6.58 (m, 2H), 6.58 – 6.54 (m, 1H), 6.49 – 6.45 (m, 1H), 4.00 (ddd,  $J$  = 13.1, 9.0, 2.9 Hz, 1H), 3.30 – 3.12 (m, 4H), 3.12 – 2.97 (m, 3H) ppm.

**<sup>13</sup>C NMR** (125 MHz,  $\text{CDCl}_3$ ) 185.8 (C), 181.9 (C), 143.4 (C), 140.8 (C), 139.7 (C), 139.2 (C), 138.6 (CH), 137.3 (CH), 134.9 (CH), 134.2 (CH), 133.1 (C), 132.8 (CH), 132.7 (CH), 132.3 (CH), 132.2 (C), 132.1 (CH), 129.2 (2CH), 128.8 (2CH), 96.6 (CH), 36.7 ( $\text{CH}_2$ ), 35.6 ( $\text{CH}_2$ ), 35.2 ( $\text{CH}_2$ ), 35.0 ( $\text{CH}_2$ ) ppm.

**<sup>19</sup>F NMR** (470 MHz,  $\text{CDCl}_3$ )  $\delta$  139.96 (qd,  $J$  = 74.8, 29.1 Hz, 2F) ppm.

**IR**  $\nu$  2927, 2855, 1733, 1593, 1533, 1491, 1364, 1235, 1173, 1071, 1041, 908, 780, 719  $\text{cm}^{-1}$ .

**$[\alpha]_{589}$**  = –82 (c 1,  $\text{CHCl}_3$ ).

Known compound. Spectroscopic data are in agreement with the literature.<sup>3</sup>

*(S<sub>p</sub>)-4-(1,4(1,4)-dibenzenacyclohexaphane-12-yl)-2,2-difluoro-6-phenyl-2H-1,3/3,2/4-dioxaborinine*  
**21a**

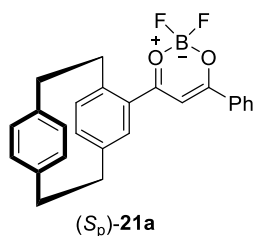

Compound (*S<sub>p</sub>*)-**21a** was prepared following the procedure employed to synthesize product (*R<sub>p</sub>*)-**21a**: (*S<sub>p</sub>*)-**20a** (49 mg, 0.14 mmol, 1.0 equiv.),  $\text{BF}_3 \cdot \text{Et}_2\text{O}$  (33  $\mu\text{L}$ , 0.26 mmol, 2.0 equiv.) in dry toluene (1 mL). (*S<sub>p</sub>*)-**21a** was obtained (54 mg, 0.14 mmol, 99 %) as a yellow amorphous solid. Spectroscopic data correspond to that previously described for compound (*R<sub>p</sub>*)-**21a**.

**$[\alpha]_{589}$**  = +71 (c 1.1,  $\text{CHCl}_3$ ).

**HPLC analysis** :  $t_{R1}$  = 16.1 min;  $t_{R2}$  = 17.8 min. [Column = Chiralcel OD (250 x 4.6 mm); eluent = *n*-heptane/*i*-PrOH (9:1); T = 20 °C; flow = 1 mL/min;  $\lambda$  = 350 nm).]

Co-injection of (*R<sub>p</sub>*)-**21a** and (*S<sub>p</sub>*)-**21a**.

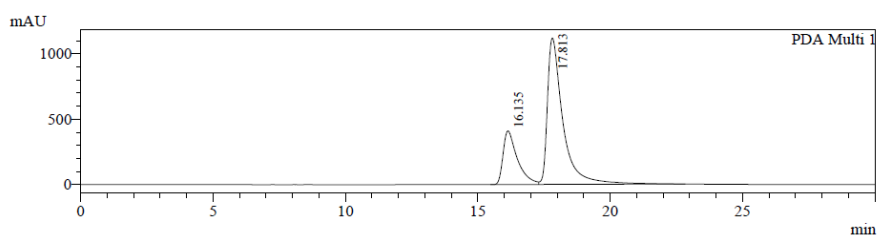

1 PDA Multi 1 / 350nm 4nm

PeakTable

PDA Ch1 350nm 4nm

| Peak# | Ret. Time | Area     | Height  | Area %  | Height % |
|-------|-----------|----------|---------|---------|----------|
| 1     | 16.135    | 15440860 | 410692  | 25.236  | 26.824   |
| 2     | 17.813    | 45743845 | 1120344 | 74.764  | 73.176   |
| Total |           | 61184705 | 1531037 | 100.000 | 100.000  |

Injection of (*R<sub>p</sub>*)-**21a**:  $t_{R1}$  = 16.3 min

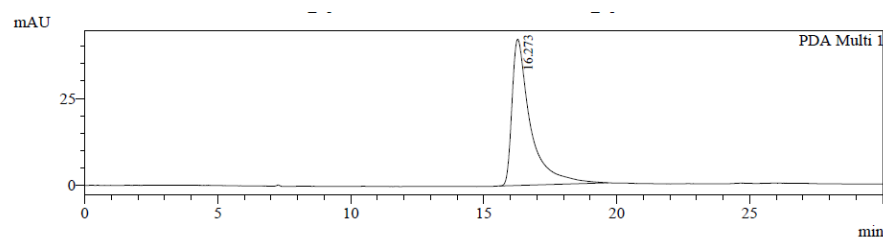

1 PDA Multi 1 / 350nm 4nm

PeakTable

PDA Ch1 350nm 4nm

| Peak# | Ret. Time | Area    | Height | Area %  | Height % |
|-------|-----------|---------|--------|---------|----------|
| 1     | 16.273    | 2036788 | 42046  | 100.000 | 100.000  |
| Total |           | 2036788 | 42046  | 100.000 | 100.000  |

Injection of (*S<sub>p</sub>*)-**21a**:  $t_{R2}$  = 17.8 min.

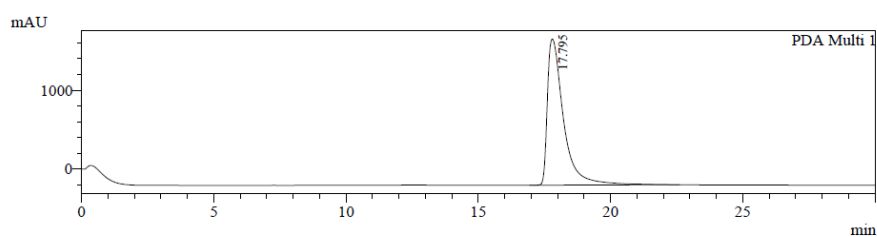

1 PDA Multi 1 / 350nm 4nm

PeakTable

PDA Ch1 350nm 4nm

| Peak# | Ret. Time | Area     | Height  | Area %  | Height % |
|-------|-----------|----------|---------|---------|----------|
| 1     | 17.795    | 78878294 | 1853850 | 100.000 | 100.000  |
| Total |           | 78878294 | 1853850 | 100.000 | 100.000  |

### UV-vis absorption and fluorescence emission spectroscopy:

Absorbance max: 390 nm ( $10^{-5}$  M solution in  $\text{CHCl}_3$ ; yellow line); Emission max: 505 nm ( $10^{-6}$  M solution in  $\text{CHCl}_3$ ,  $\lambda_{\text{ex}} = 360$  nm, red line).

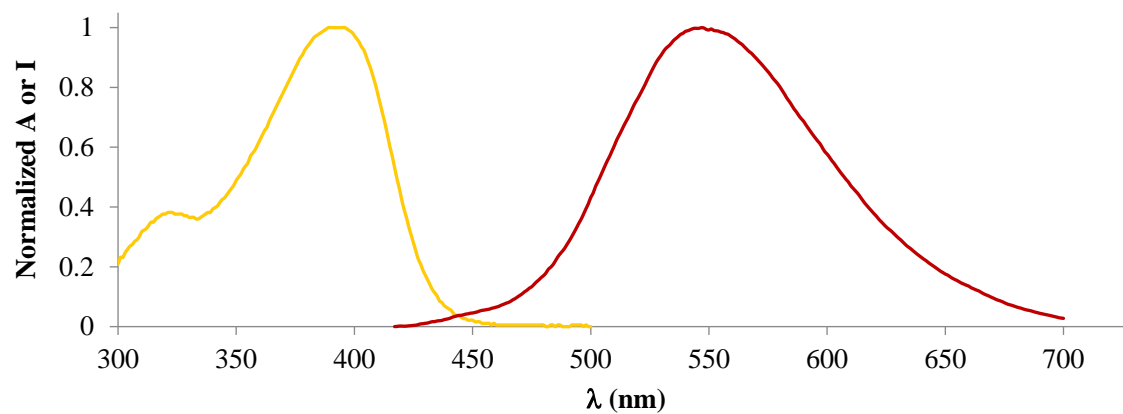

*(R<sub>p</sub>)-4-(1,4(1,4)-dibenzenacyclohexaphane-12-yl)-2,2-difluoro-6-(4-methoxyphenyl)-2H-1,3/3,2/4-dioxaborinine 21b*

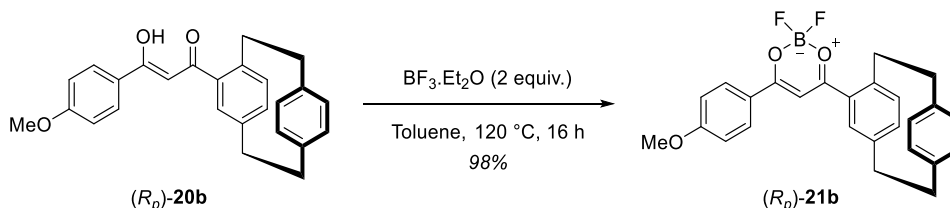

Compound (*R<sub>p</sub>*)-**21b** was prepared following the procedure employed to synthesize product (*R<sub>p</sub>*)-**20a**: (*R<sub>p</sub>*)-**20b** (15 mg, 0.04 mmol, 1.0 equiv.),  $\text{BF}_3 \cdot \text{Et}_2\text{O}$  (10  $\mu\text{L}$ , 0.08 mmol, 2.0 equiv.) in dry toluene (0.5 mL). Cy:DCM (2:1). (*R<sub>p</sub>*)-**20b** was obtained (16.5 mg, 0.04 mmol, 98 %) as a yellow amorphous solid.

<sup>1</sup>H NMR (500 MHz,  $\text{CDCl}_3$ )  $\delta$  8.10-8.02 (m, 2H), 7.00 (d,  $J$  = 1.8 Hz, 1H), 7.00-6.93 (m, 2H), 6.71-6.65 (m, 2H), 6.60-6.54 (m, 2H), 6.51 (qd,  $J$  = 1.8, 8 Hz, 2H), 6.48 (dd,  $J$  = 1.7, 8 Hz, 2H), 3.91 (td,  $J$  = 3, 11.1 Hz, 1H), 3.86 (s, 3H), 3.19-3.06 (m, 4H), 3.04-2.88 (m, 3H) ppm.

<sup>13</sup>C NMR (125 MHz,  $\text{CDCl}_3$ )  $\delta$  184.2 (C), 181.1 (C), 165.5 (C), 142.8 (C), 140.7 (C), 139.8 (C), 138.1 (CH), 138.1 (CH), 137.1 (CH), 134.0 (CH), 133.4 (C), 132.8 (CH), 132.7 (CH), 132.3 (CH), 132.1 (CH), 131.4 (CH), 114.7 (CH), 95.8 (CH), 55.8 (CH<sub>3</sub>), 36.6 (CH<sub>2</sub>), 35.6 (CH<sub>2</sub>), 35.2 (CH<sub>2</sub>), 35.1 (CH<sub>2</sub>) ppm.

IR  $\nu$  2930, 1738, 1541, 1506, 1364, 1239, 1178, 1040, 911, 813, 734  $\text{cm}^{-1}$ .

HRMS (ESI-Orbitrap)  $m/z$ : [M+Na] Calcd for  $\text{C}_{26}\text{H}_{23}\text{BF}_2\text{O}_3\text{Na}$  455.1601; Found 455.1584.

$[\alpha]_{589} = -438$  (c 0.34,  $\text{CHCl}_3$ ).

Novel compound. Copies of the NMR spectra are provided at the end of the document.

*(S<sub>p</sub>)-4-(1,4(1,4)-dibenzenacyclohexaphane-12-yl)-2,2-difluoro-6-(4-methoxyphenyl)-2H-1,3/3,2/4-dioxaborinine 21b*

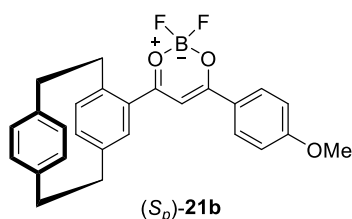

Compound (*S<sub>p</sub>*)-**21b** was prepared following the procedure employed to synthesize product (*R<sub>p</sub>*)-**21a**: (*S<sub>p</sub>*)-**20b** (20 mg, 0.05 mmol, 1.0 equiv.),  $\text{BF}_3 \cdot \text{Et}_2\text{O}$  (13  $\mu\text{L}$ , 0.10 mmol, 2.0 equiv.) in dry toluene (0.5 mL). Cy:DCM (2:1). (*S<sub>p</sub>*)-**21b** was obtained (20.2 mg, 0.05 mmol, 90 %) as a yellow amorphous solid. Spectroscopic data correspond to that previously described for compound (*R<sub>p</sub>*)-**21b**.

$[\alpha]_{589} = +444$  (c 0.43,  $\text{CHCl}_3$ ).

**HPLC analysis** :  $t_{R1}$  = 34.8 min;  $t_{R2}$  = 54.4 min. [Column = Chiralcel OD (250 x 4.6 mm); eluent = *n*-heptane/*i*-PrOH (8:2); T = 20 °C; flow = 1 mL/min;  $\lambda$  = 400 nm).]

Co-injection of (*R<sub>p</sub>*)-**21b** and (*S<sub>p</sub>*)-**21b**.

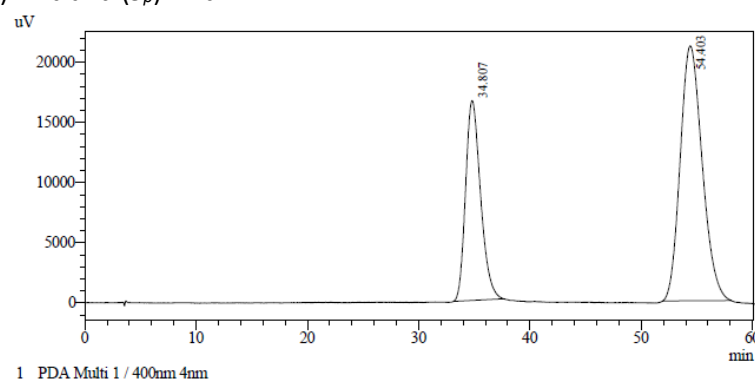

1 PDA Multi 1 / 400nm 4nm

PeakTable

PDA Ch1 400nm 4nm

| Peak# | Ret. Time | Area    | Height | Area %  | Height % |
|-------|-----------|---------|--------|---------|----------|
| 1     | 34.807    | 1554374 | 16597  | 34.806  | 43.935   |
| 2     | 54.403    | 2911448 | 21179  | 65.194  | 56.065   |
| Total |           | 4465822 | 37776  | 100.000 | 100.000  |

Injection of (*R<sub>p</sub>*)-**21b**:  $t_{R1}$  = 34.8 min;  $t_{R2}$  = 54.6 min

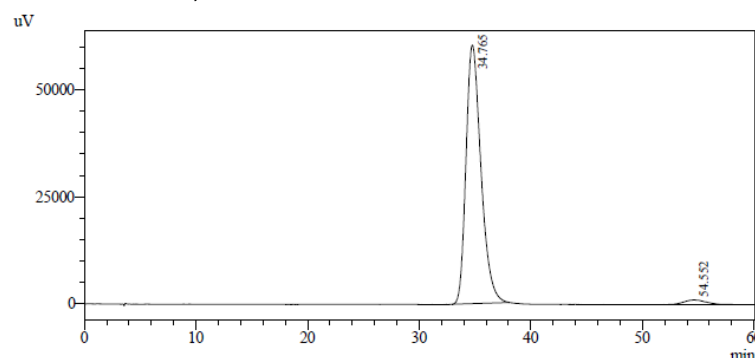

1 PDA Multi 1 / 400nm 4nm

PeakTable

PDA Ch1 400nm 4nm

| Peak# | Ret. Time | Area    | Height | Area %  | Height % |
|-------|-----------|---------|--------|---------|----------|
| 1     | 34.765    | 5630465 | 60387  | 97.338  | 98.202   |
| 2     | 54.552    | 153977  | 1105   | 2.662   | 1.798    |
| Total |           | 5784442 | 61493  | 100.000 | 100.000  |

Injection of (*S<sub>p</sub>*)-**3.47**:  $t_{R1}$  = 35.1 min;  $t_{R2}$  = 54.7 min

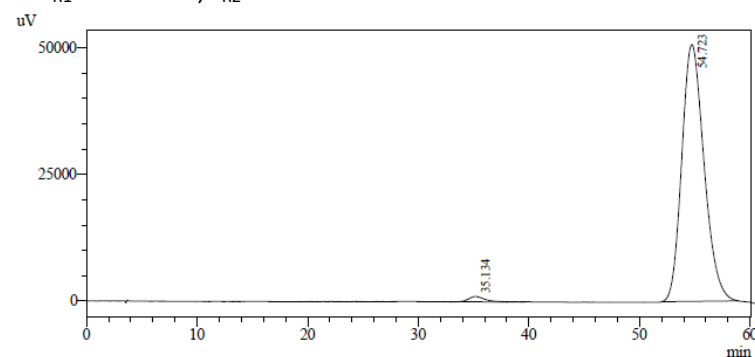

1 PDA Multi 1 / 400nm 4nm

PeakTable

PDA Ch1 400nm 4nm

| Peak# | Ret. Time | Area    | Height | Area %  | Height % |
|-------|-----------|---------|--------|---------|----------|
| 1     | 35.134    | 105727  | 1053   | 1.468   | 2.035    |
| 2     | 54.723    | 7098795 | 50706  | 98.532  | 97.965   |
| Total |           | 7204522 | 51759  | 100.000 | 100.000  |

### UV-vis absorption and fluorescence emission spectroscopy:

Absorbance max: 408 nm ( $10^{-5}$  M solution in  $\text{CHCl}_3$ ); Emission max: 535 nm ( $10^{-6}$  M solution in  $\text{CHCl}_3$ ,  $\lambda_{\text{ex}} = 360$  nm). QY = 2,6 %<sup>5</sup>

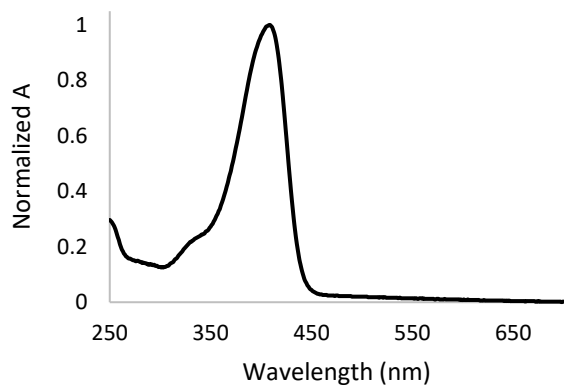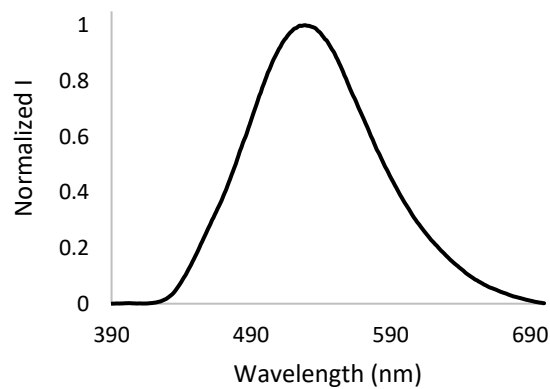

<sup>5</sup> Relative quantum yield (QY) was calculated using anthracene in cyclohexane as fluorescence standard (QY = 36%). The excitation wavelength was fixed at 340 nm for both the sample and the standard.



# Copies of $^1\text{H}$ NMR, $^{13}\text{C}$ NMR and $^{19}\text{F}$ NMR spectra

(Z)-1-(1,4(1,4)-dibenzenacyclohexaphane-12-yl)-3-hydroxy-3-(4-methoxyphenyl)prop-2-en-1-one **20b**

$^1\text{H}$  NMR (500 MHz,  $\text{CDCl}_3$ )

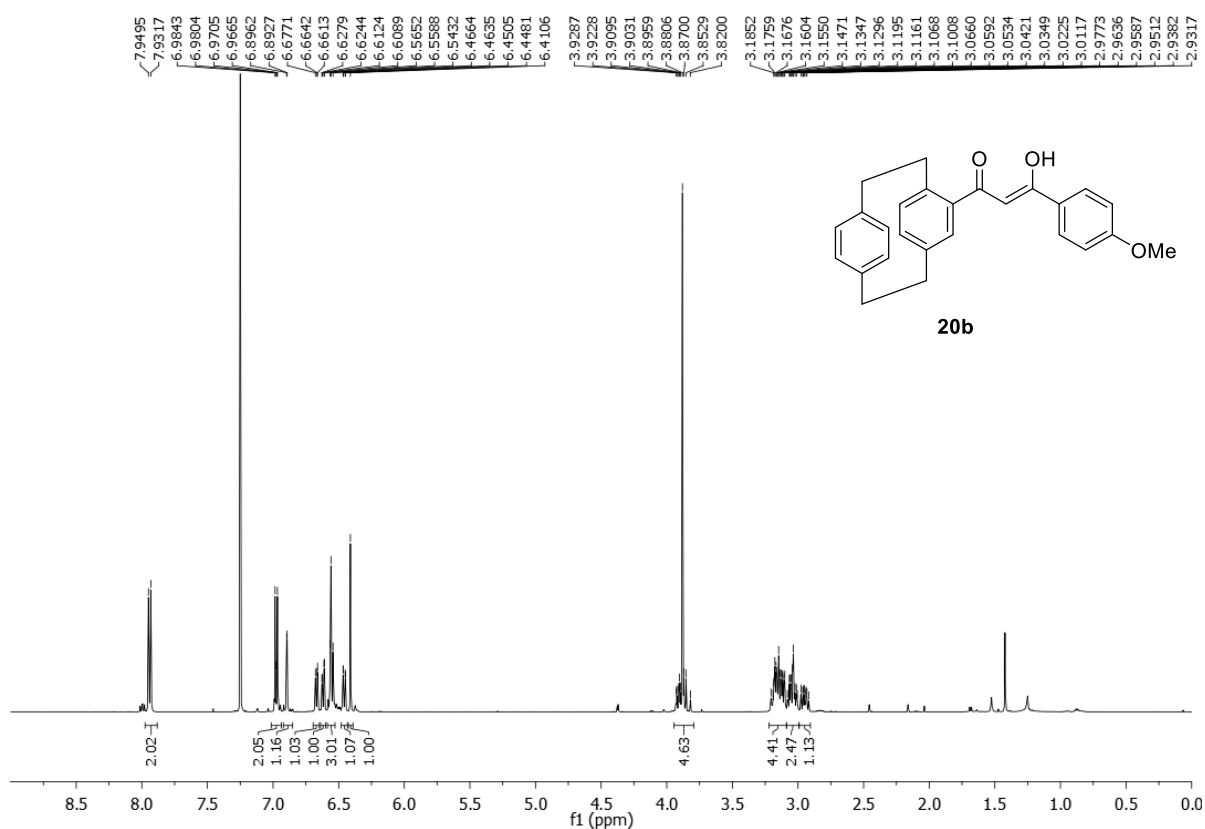

$^{13}\text{C}$  NMR (126 MHz,  $\text{CDCl}_3$ )

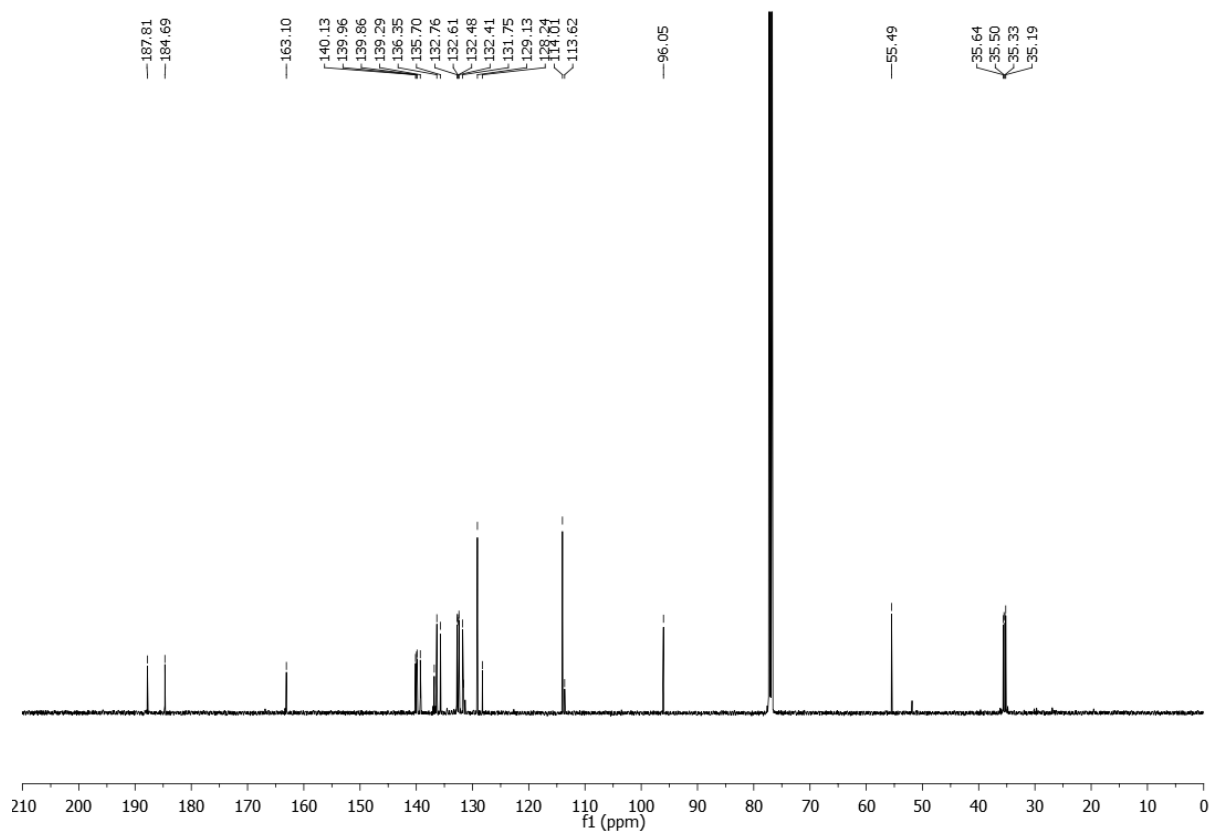

4-(1,4(1,4)-dibenzenacyclohexaphane-12-yl)-2,2-difluoro-6-(4-methoxyphenyl)-2H-1,3/3,2/4-dioxaborinine **21b**

$^1\text{H}$  NMR (500 MHz,  $\text{CDCl}_3$ )

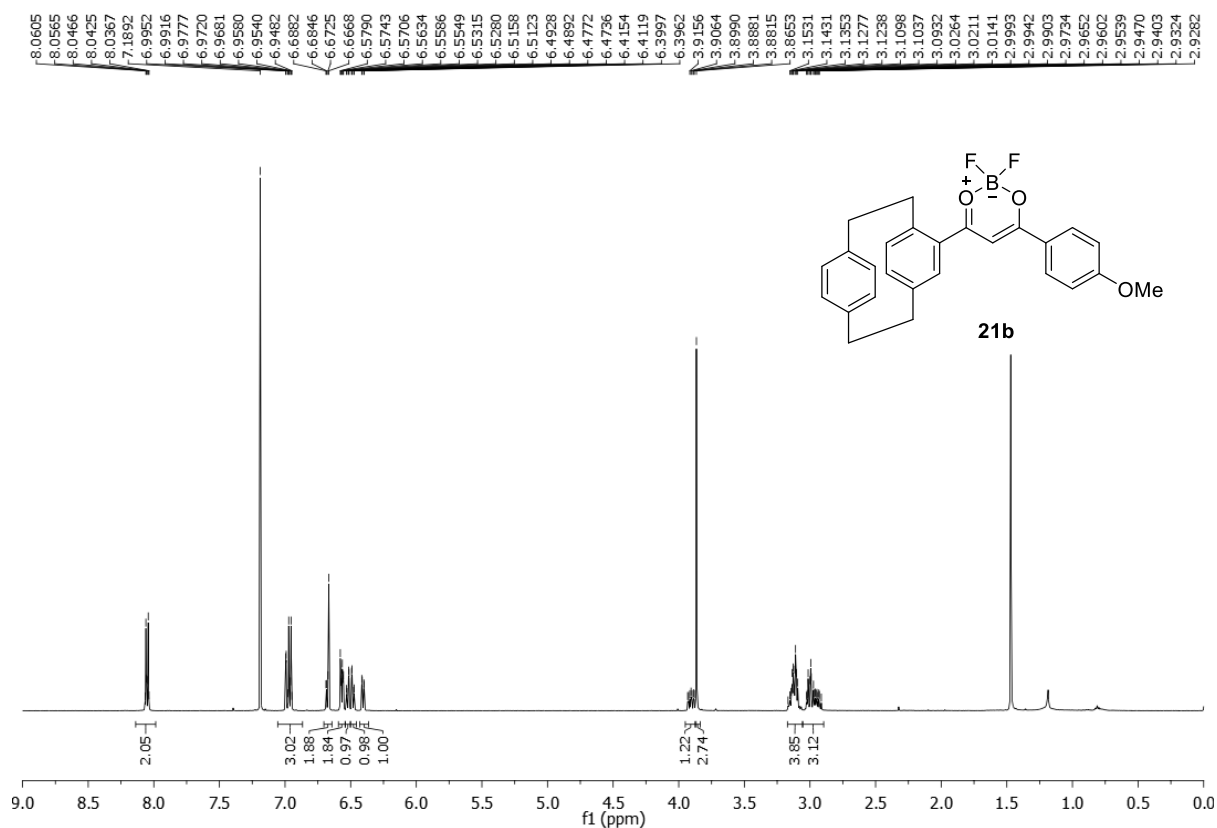

$^{13}\text{C}$  NMR (126 MHz,  $\text{CDCl}_3$ )

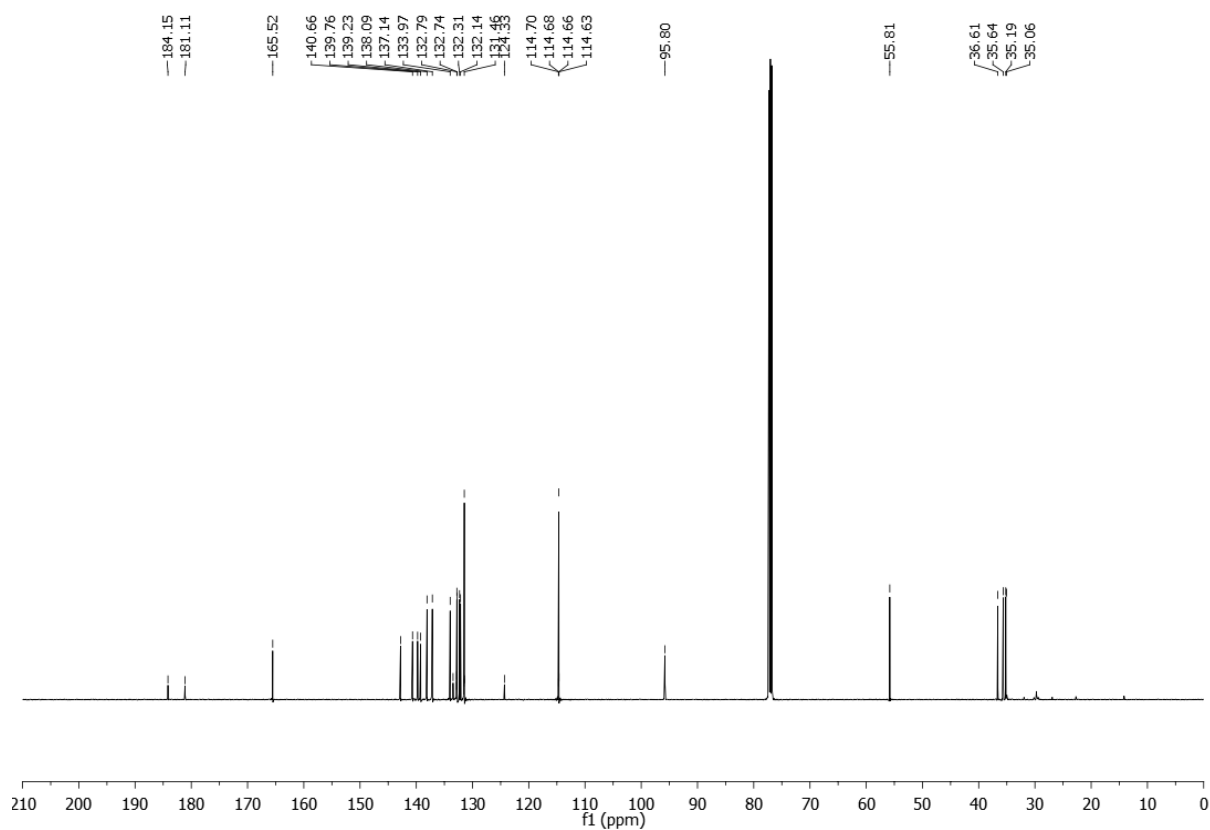

$^{19}\text{F}$  NMR (471 MHz,  $\text{CDCl}_3$ )

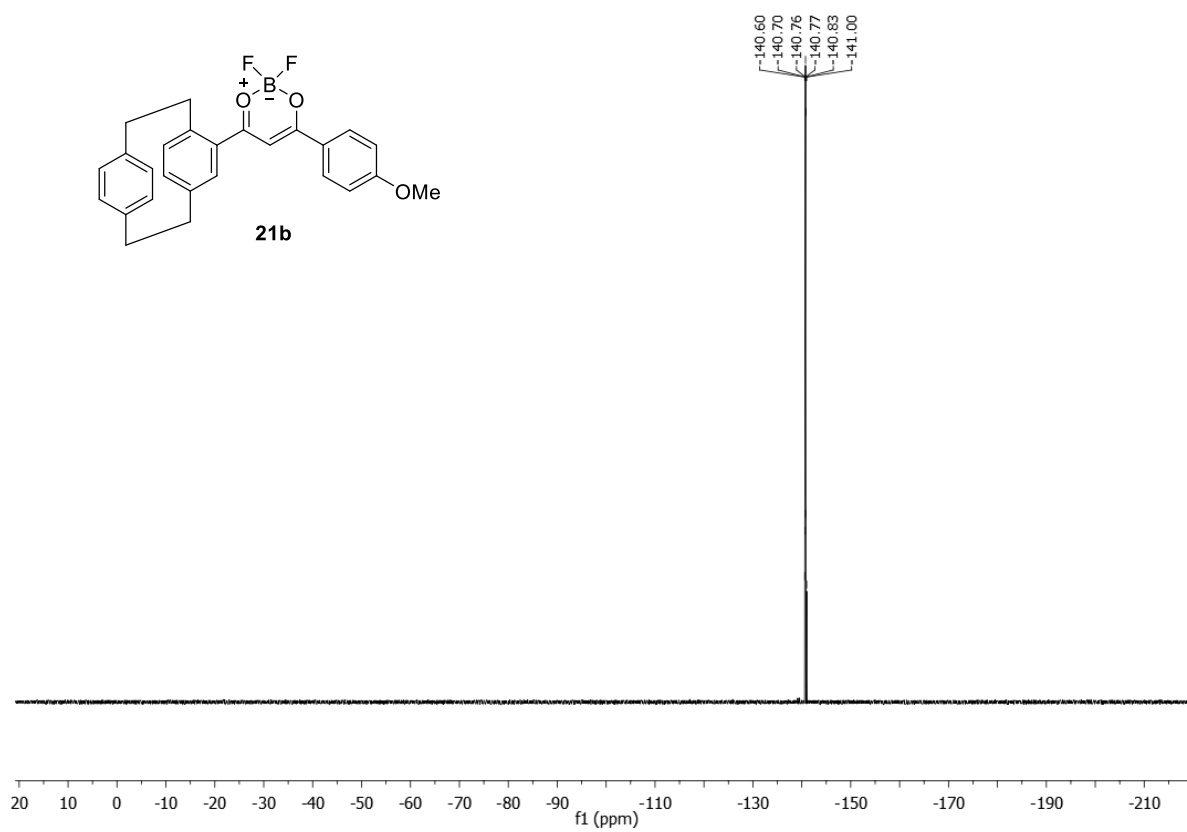

## Circular dichroism and circularly polarized luminescence – Dissymmetry factors

Absorption dissymmetry factors were obtained using the following formula:

$$g_{abs} = | 2 [\varepsilon_L (\lambda) - \varepsilon_R (\lambda)] / [\varepsilon_L (\lambda) + \varepsilon_R (\lambda)] |$$

where  $\varepsilon_L$  and  $\varepsilon_R$  denote the molar extinction coefficients for left and right circularly polarized light, respectively.

Luminescence dissymmetry factors were obtained using the following formula:

$$g_{lum} = | 2 [I_L (\lambda) - I_R (\lambda)] / [I_L (\lambda) + I_R (\lambda)] |$$

where  $I_L$  and  $I_R$  are the photoluminescence intensities of left and right circularly polarized luminescence.

*pCp-based naphthalenes  $S_p$ -5a and  $R_p$ -5a*

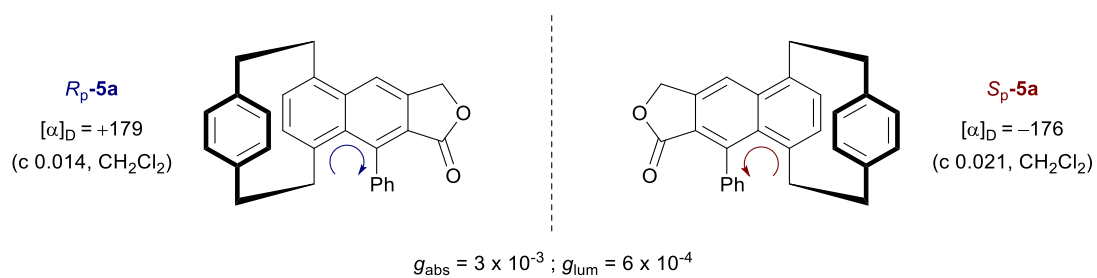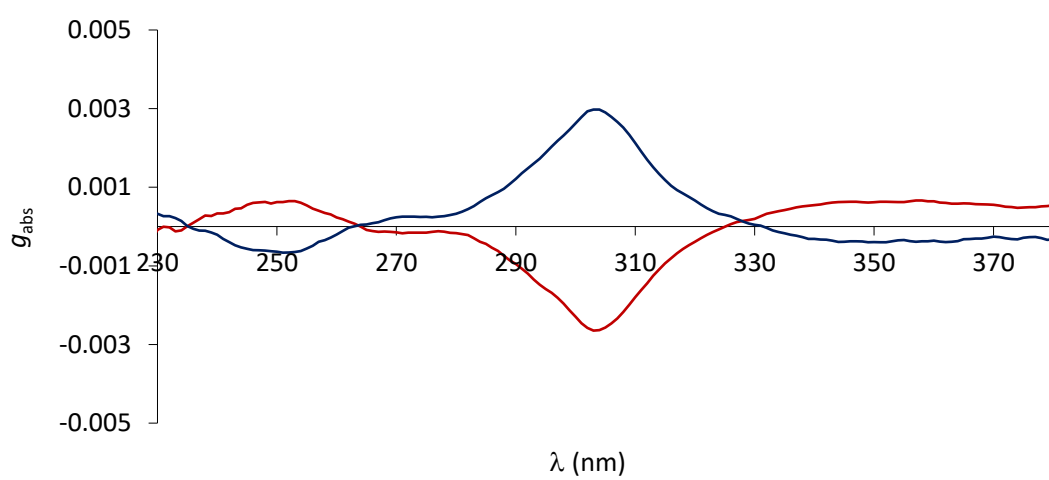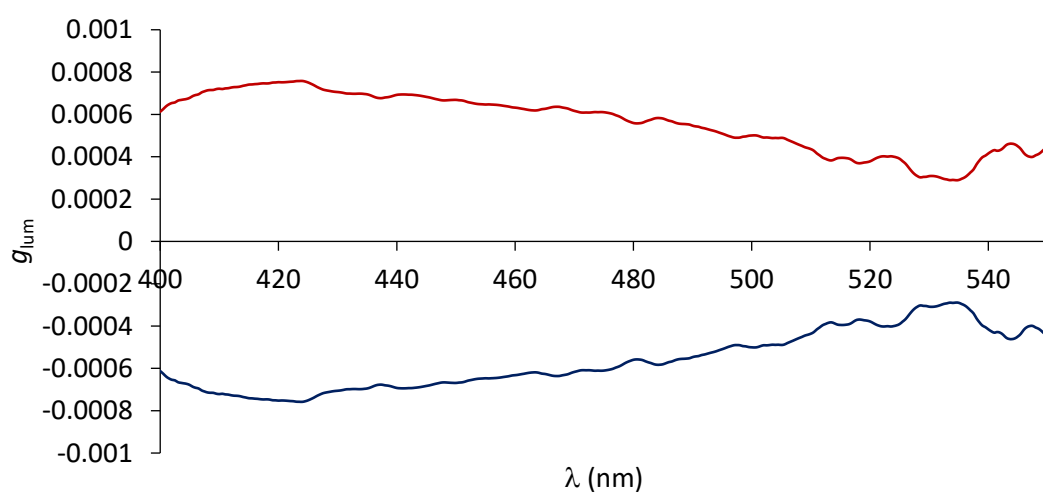

*pCp*-based coumarins *R<sub>p</sub>*-**10b** and *S<sub>p</sub>*-**10b**

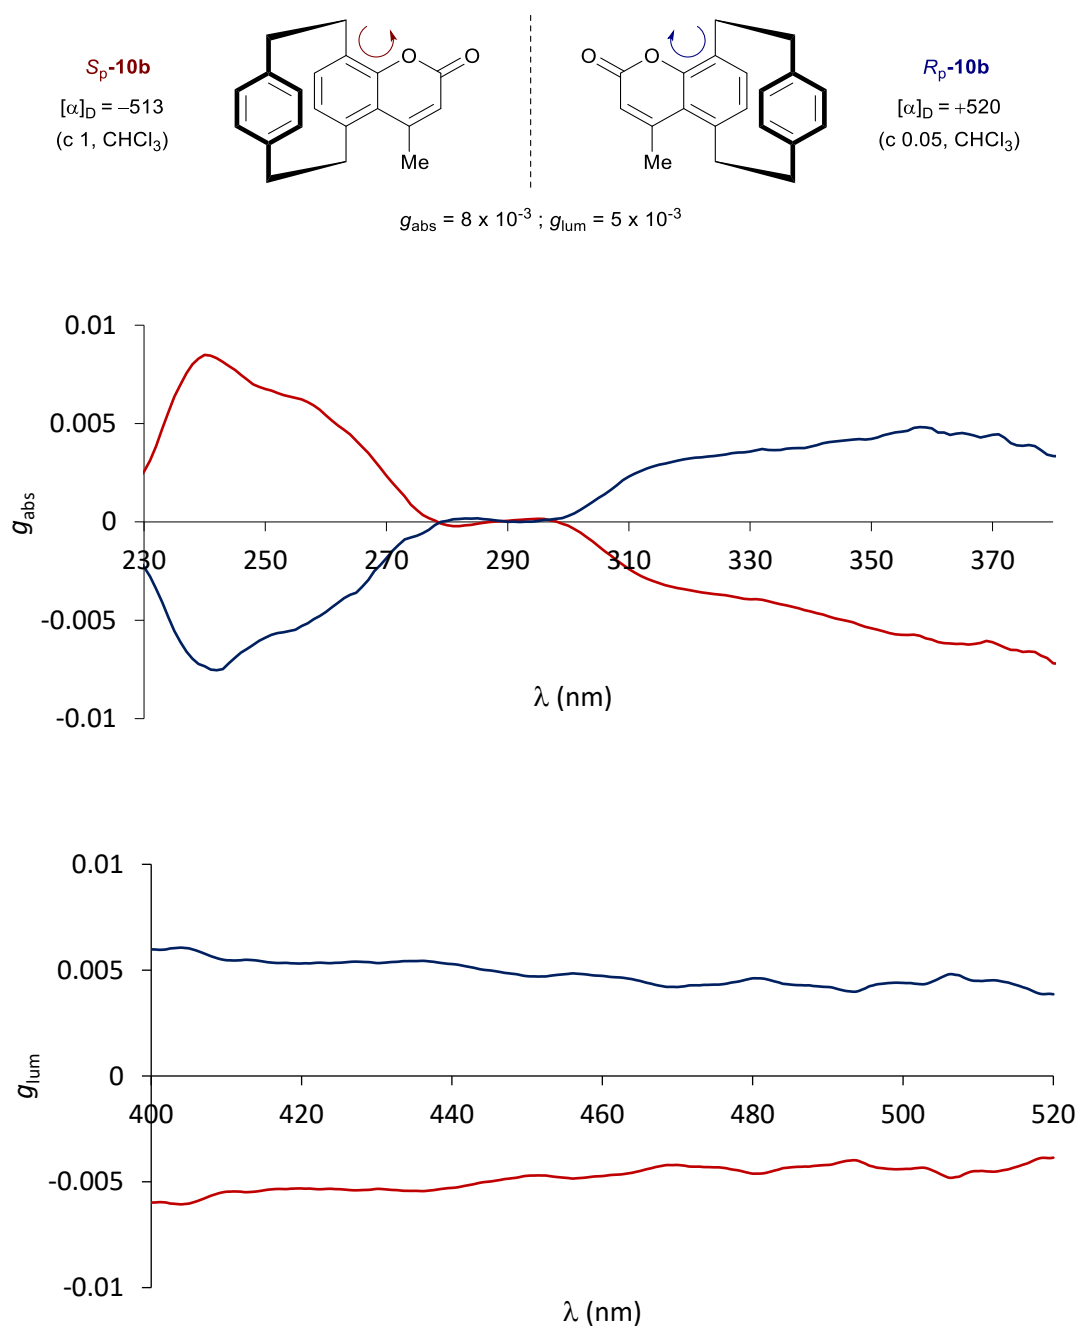

*pCp-based PRODAN derivatives  $R_p$ -15 and  $S_p$ -15*

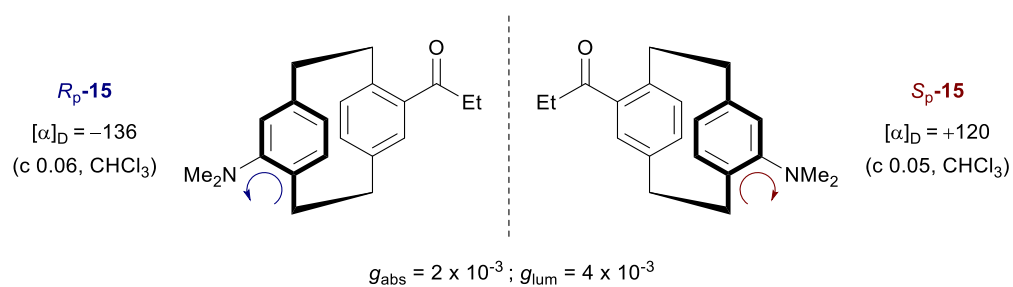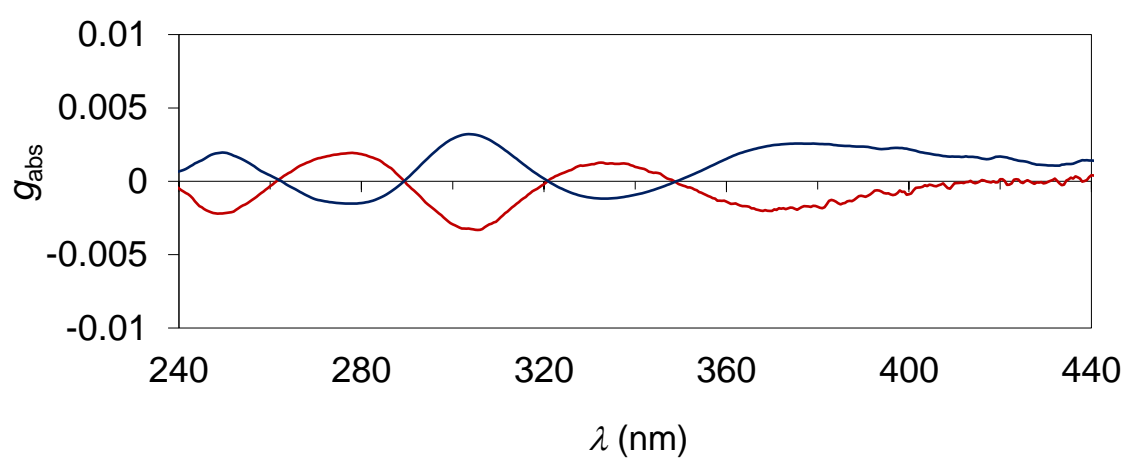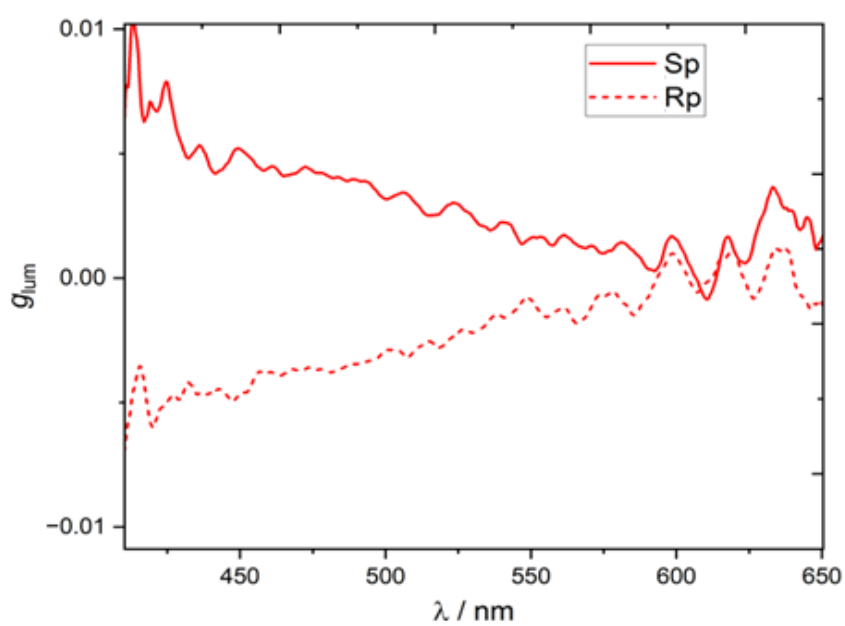

*pCp-based boron-acac  $R_p$ -21a and  $S_p$ -21a*

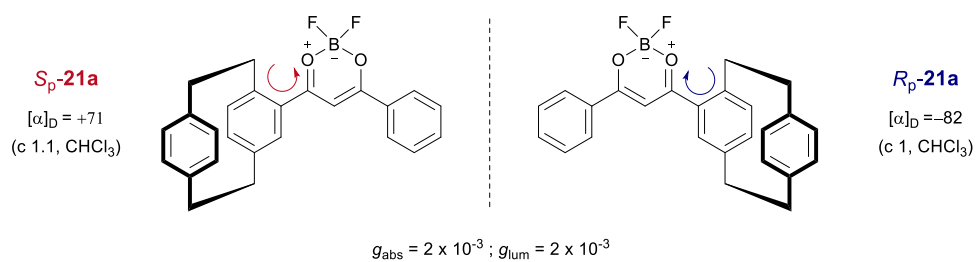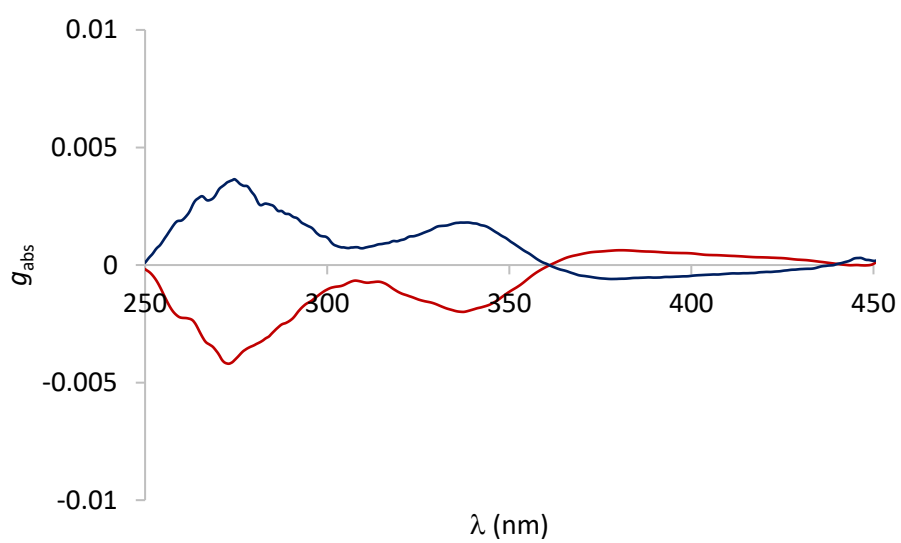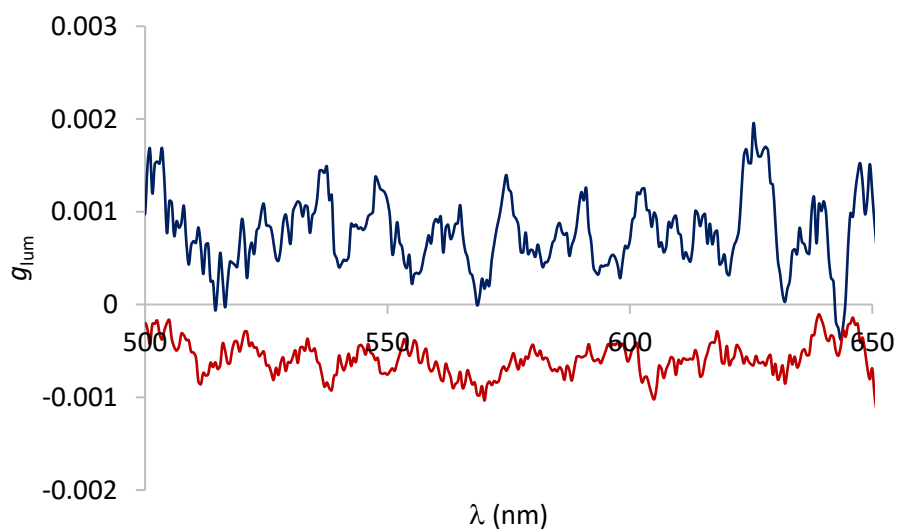



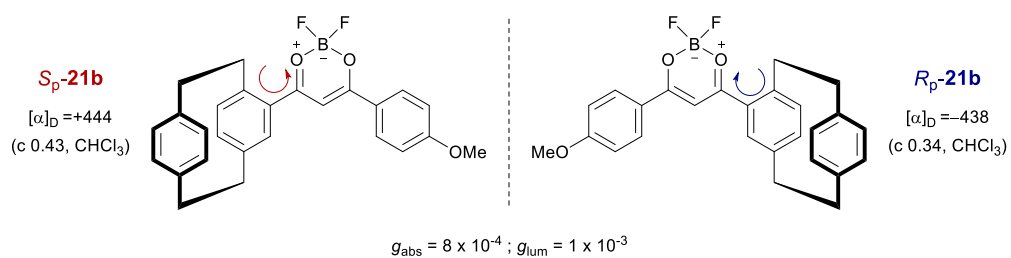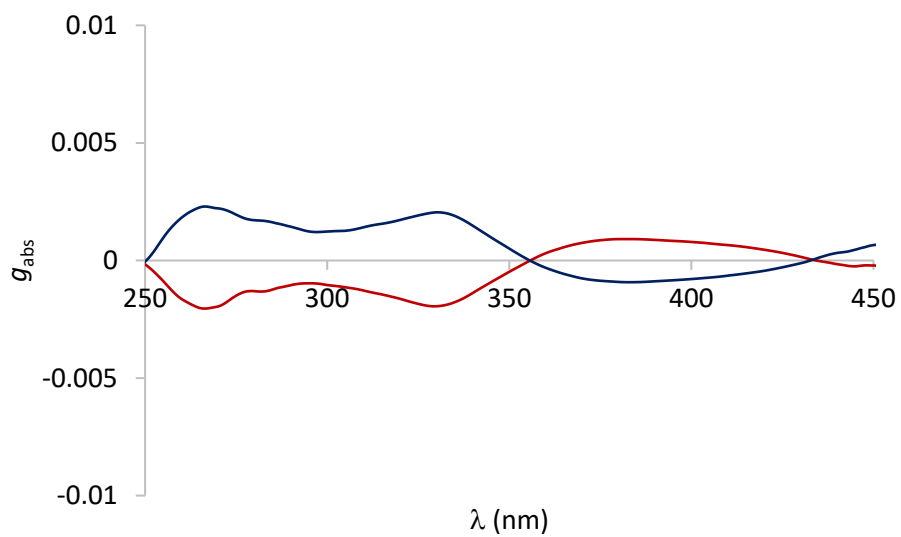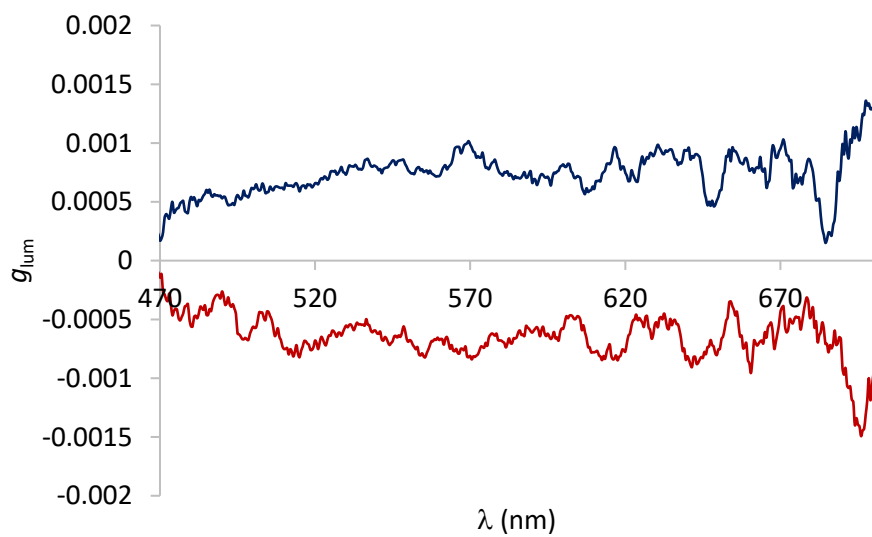

Supplement: d2tc04885j1.pdf [file d2tc04885j1.pdf]
